# Supplementary material for: Effects of CXCR7-neutralizing antibody on neurogenesis in the hippocampal dentate gyrus and cognitive function in the chronic phase of cerebral ischemia
Source: PubMed Central journal article supplement — Neural Regen Res. 2019 Dec 10;15(6):1079–85. doi: 10.4103/1673-5374.270416 (PMC7034276; doi:10.4103/1673-5374.270416), 2019-12-10
Supplement: NRR-15-1079_Suppl1.pdf [file NRR-15-1079_Suppl1.pdf]

## OPEN PEER REVIEW REPORT 1

**Reviewer 1:** Cheung-Ter Ong, Chia Yi christian hospital, Taiwan, China; Aurel Popa-Wagner, University Medicine Rostock, Germany.

**Comments to the authors:**

The strength of the manuscript is it investigate the effect of CXCR7 antibody on the neurogenesis and on the recovery of cognitive function in the rates received cerebral ischemia. It is interesting and important in the treatment of ischemic stroke.

Weakness of the article: The author did not present that whether the rates died during study was related to the injection of CXCR7 antibody.

In the animal study, the authors investigate the effect of CXCR7 antibody on the neurogenesis in the dentate gyrus and cognitive function recovery in rates after ischemia. The results show that anti-CXCR7 antibody enhances the neurogenesis in the dentate gyrus and improves the cognitive functional recovery after ischemic stroke. The study is interesting and important. However; there are small flaw, minor revision is necessary.

There are some spelling error in Line 28, 40, 117, 135.

**Methods**

Three rates died and not included in the measurement of infarct volume. The 3 rates were in the Isc group or in the group that treated with anti-CXCR7 antibody should be elucidated. If the 3 died rates were in the group treated with anti-CXCR7 antibody, author should discuss whether anti-CXCR7 antibody is harmful to animal.
